# Supplementary material for: Dabigatran, rivaroxaban, apixaban, argatroban and fondaparinux and their effects on coagulation POC and platelet function tests
Source: publisher site journal article supplement (doi:10.1515/cclm-2013-0936), 2014-01-01
Supplement: Supplementary file 1 [file Supplemental_data_Table_1_Eller_et_al_CCLM.2013.0691.xlsx]

## Sheet: Tabelle1
	company	stock solution		working solutions		final concentrations$
		concentration	diluent	concentration	diluent
Argatroban	Mitsubishi Pharma Europe Ltd. (London, UK)	100 mg/ml	50% ethanol	100 mg/ml	50% ethanol	1 mg/ml
				15 mg/ml	50% ethanol	150 µg/ml
				225 µg/ml	50% ethanol	2.25 µg/ml
				150 µg/ml	50% ethanol	1.5 µg/ml
				75 µg/ml	50% ethanol	0.75 µg/ml
Fondaparinux	GlaxoSmithKline GmbH & Co. KG (Munich, Germany)	5 mg/ml	0.9% NaCl	5 mg/ml	0.9% NaCl	250 µg/ml
				1.25 mg/ml	0.9% NaCl	25 µg/ml
				12.5 µg/ml	0.9% NaCl	250 ng/ml
				100 µg/ml	0.9% NaCl	2 µg/ml
				75 µg/ml	0.9% NaCl	1.5 µg/ml
				50 µg/ml	0.9% NaCl	1 µg/ml
Dabigatran	ALSACHIM (Illkrich, France)	1 mg/ml	50% methanol	1 mg/ml	50% methanol	20 µg/ml
				15 µg/ml	distilled water#	300 ng/ml
				10 µg/ml	distilled water#	200 ng/ml
				5 µg/ml	distilled water#	100 ng/ml
Rivaroxaban	ALSACHIM (Illkrich, France)	1 mg/ml	10% DMSO	1 mg/ml	10% DMSO	20 µg/ml
				15 µg/ml	distilled water#	300 ng/ml
				10 µg/ml	distilled water#	200 ng/ml
				5 µg/ml	distilled water#	100 ng/ml
Apixaban	ALSACHIM (Illkrich, France)	100 µg/ml	10% DMSO	100 µg/ml	10% DMSO	2 µg/ml
				25 µg/ml	distilled water#	500 ng/ml
				15 µg/ml	distilled water#	300 ng/ml
				10 µg/ml	distilled water#	200 ng/ml
				5 µg/ml	distilled water#	100 ng/ml
$: we added the working solution to reach the final concentrations in whole blood (ACT, ROTEM, Multiplate, PFA) and in platelet rich plasma (LTA)
#: we diluted the stock solutions with distilled water
