# Supplementary material for: Dabigatran, rivaroxaban, apixaban, argatroban and fondaparinux and their effects on coagulation POC and platelet function tests
Source: publisher site journal article supplement (doi:10.1515/cclm-2013-0936), 2014-01-01
Supplement: Supplementary file 1 [file Supplementary_Material_Methods_CCLM.2013.0936.doc]

Supplementary

Blood collection

Blood samples were taken using a 20-gauge butterfly needle with tubing and the corresponding tubes from Kabe® (Primavette S®) (Nümbrecht-Elsenroth, Germany). The first 3 – 5 ml of blood were discarded. In order to obtain citrated blood for the ROTEM® assays, blood was collected in 2.9 ml tubes containing 290 µl sodium citrate (100 mmol/l). For measurements with PFA 200® and platelet aggregation assays, tubes containing 0.129 mol/l buffered sodium citrate (pH 5.5) were used.

To obtain heparin-anticoagulated whole blood for Multiplate® analyses, blood was collected into 2.6 ml tubes containing 12.5 I.U. heparin.

ACT blood was collected in tubes (Kabe®)without additive.

Basic hematological parameters such as white blood cells (WBC), red blood cells (RBC), haemoglobin (Hb) and platelet count were measured in ethylendiamintetraacetate (EDTA) anticoagulated blood samples using a CELL-DYN Ruby (Abbott Deutschland GmbH & Co. KG, Wiesbaden, Germany) to define healthy donors and to verify the required values for the tests.

The blood and plasma (for LTA) respectively were maintained at ambient temperature and used within 2 hours of collection. All specimens were incubated for 20 minutes (except ACT, 1 minute) with the respective drug before the test. The analyses of each anticoagulant were performed with blood samples from 5 or 10 different donors.
